# Supplementary material
Source: publisher site journal article supplement (http://www.kjim.org/upload/media/kjim-2020-064-suppl3.pdf)
Supplement: Supplementary file 1 [file kjim-2020-064-suppl3.pdf]

**Supplementary Table 3. Comparison of clinical outcome measures according to the presence of sarcopenia in patients with AAV**

| Clinical outcome            | Sarcopenia group (n = 30) | Non-sarcopenia group (n = 87) | p value |
|-----------------------------|---------------------------|-------------------------------|---------|
| Mortality (+)               | 5 (16.7)                  | 10 (11.5)                     | 0.467   |
| Mortality (-)               | 25 (83.3)                 | 77 (88.5)                     |         |
| ESRD (+)                    | 6 (20.0)                  | 14 (16.1)                     | 0.625   |
| ESRD (-)                    | 24 (80.0)                 | 73 (83.9)                     |         |
| Disease relapse (+)         | 9 (30.0)                  | 25 (28.7)                     | 0.896   |
| Disease relapse (-)         | 21 (70.0)                 | 62 (71.3)                     |         |
| Acute coronary syndrome (+) | 0                         | 4 (4.6)                       | 0.571   |
| Acute coronary syndrome (-) | 30 (100.0)                | 83 (95.4)                     |         |
| Stroke (+)                  | 1 (3.3)                   | 6 (6.9)                       | 0.676   |
| Stroke (-)                  | 29 (96.7)                 | 81 (93.1)                     |         |

Values are expressed as number (%).

AAV, anti-neutrophil cytoplasmic antibody-associated vasculitis; ESRD, end-stage renal disease.
